# Supplementary material for: Polydopamine functionalized hydrogel beads as magnetically separable antibacterial materials
Source: PubMed Central journal article supplement — RSC Adv. 2019 May 1;9(24):13444–57. doi: 10.1039/c9ra00623k (PMC9063863; doi:10.1039/c9ra00623k), 2019-05-01
Supplement: RA-009-C9RA00623K-s001.pdf [file RA-009-C9RA00623K-s001.pdf]

# Supporting Information

## Polydopamine Functionalized Hydrogel Beads as Magnetically Separable Antibacterial Materials

**Ishita Matai <sup>a,b\*</sup>, Mayank Garg <sup>a,b</sup>, Kajal Rana <sup>a</sup>, and Suman Singh <sup>a,b</sup>**

*<sup>a</sup> Central Scientific Instruments Organization (CSIR-CSIO), Chandigarh-160030, India.*

*<sup>b</sup> Academy of Scientific and Innovative Research, CSIR-CSIO, Chandigarh-160030, India.*

---

\* To whom correspondence should be addressed

Dr. Ishita Matai, Ph.D.

INSPIRE Faculty, Ubiquitous Analytical Techniques Division  
Assistant Professor, Academy of Scientific and Innovative Research (AcSIR)  
CSIR-Central Scientific Instruments Organization, Chandigarh-160030, India  
Email: [ishitamatai@csio.res.in](mailto:ishitamatai@csio.res.in), [ishitamatai11@gmail.com](mailto:ishitamatai11@gmail.com)  
Ph: +91-172-2672281

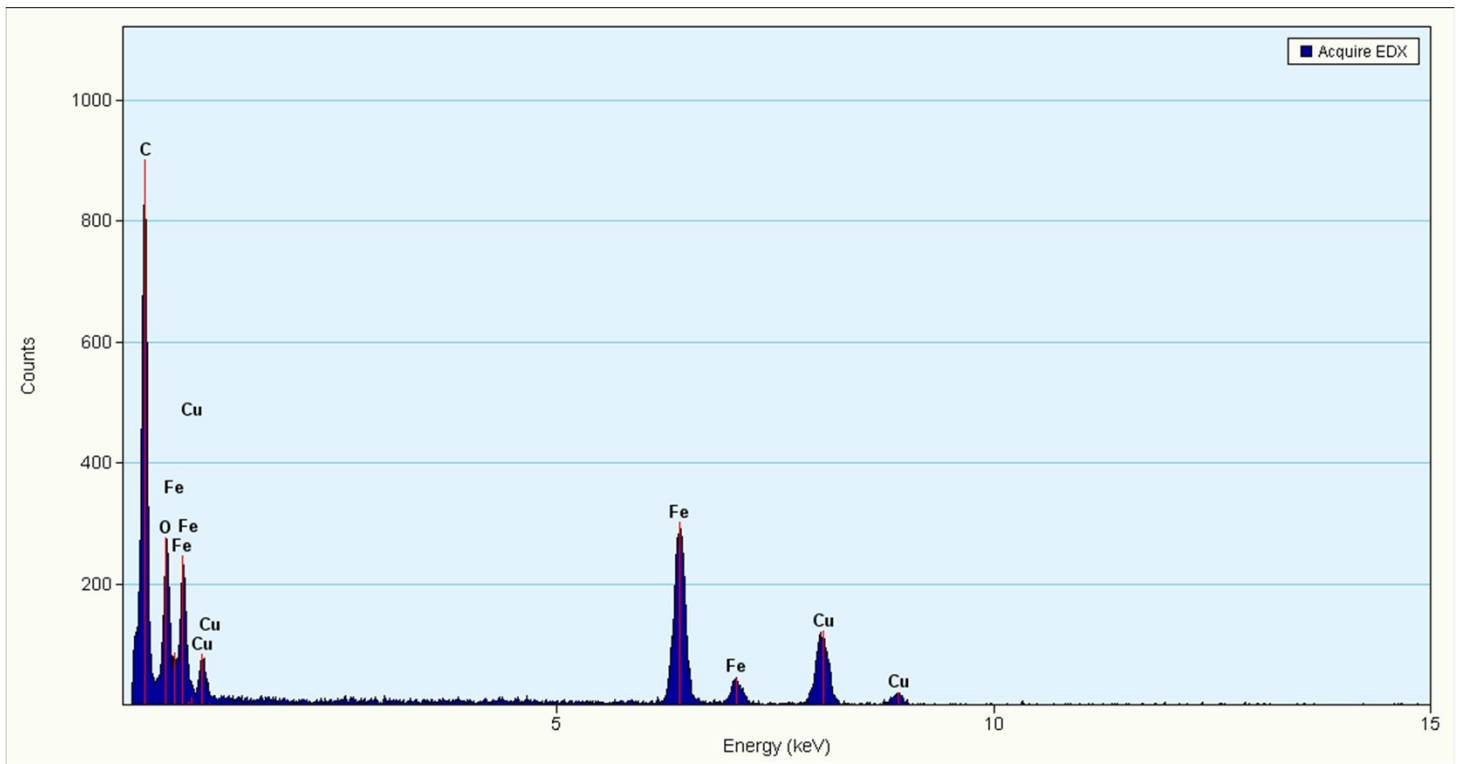

**Fig. S1.** EDS spectra of Alg/Fe<sub>3</sub>O<sub>4</sub> nanoparticles.

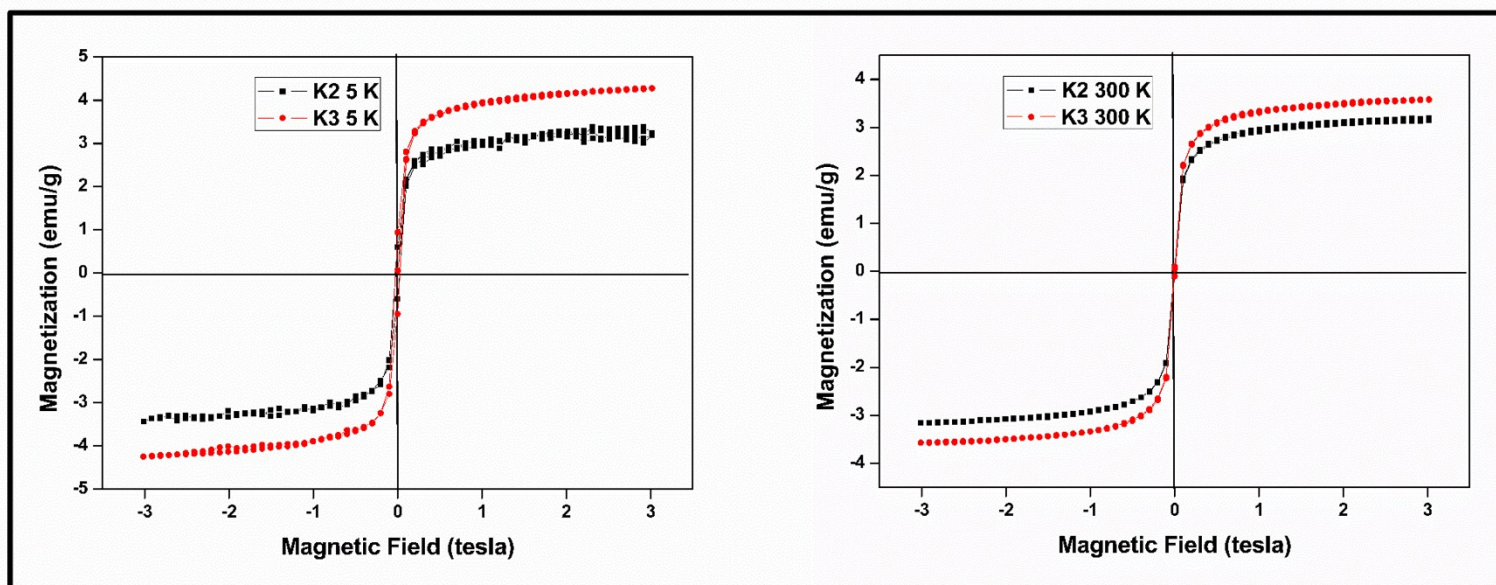

Fig. S2. VSM data of K2 and K3 beads at 5 and 300 K.

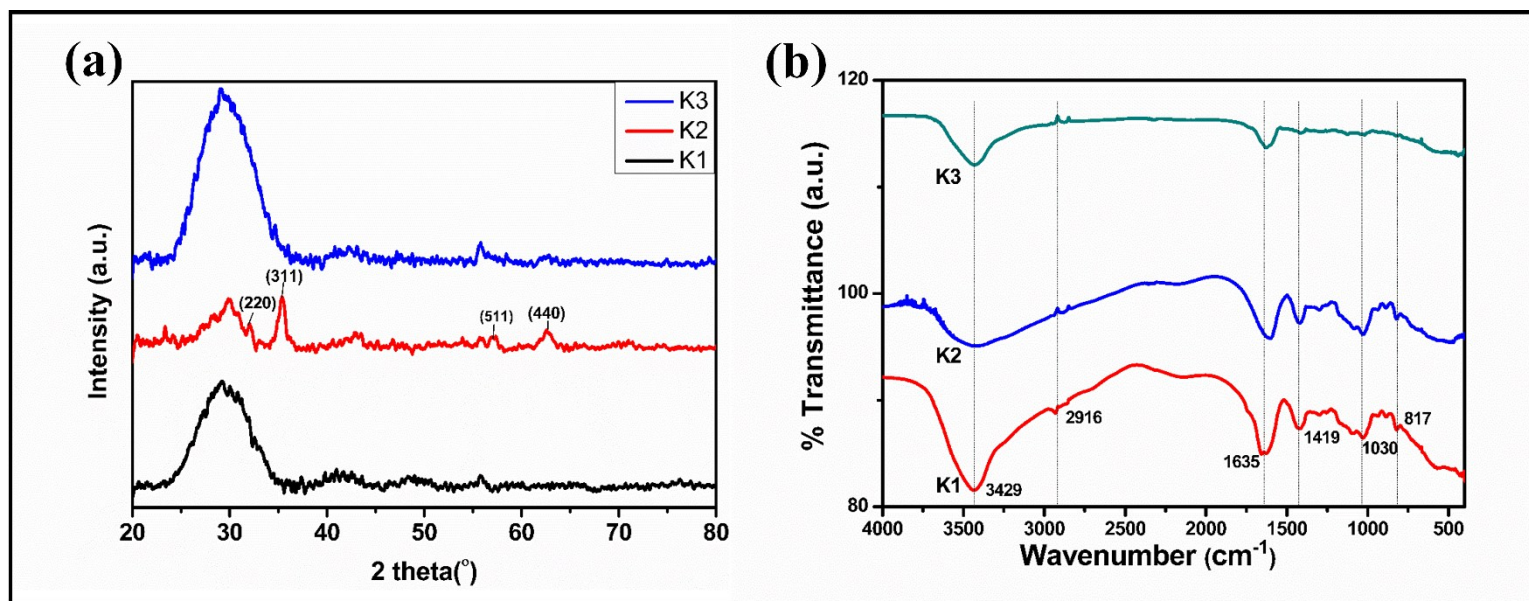

Fig. S3. (a) XRD and (b) FT-IR spectra of K1, K2 and K3 beads.

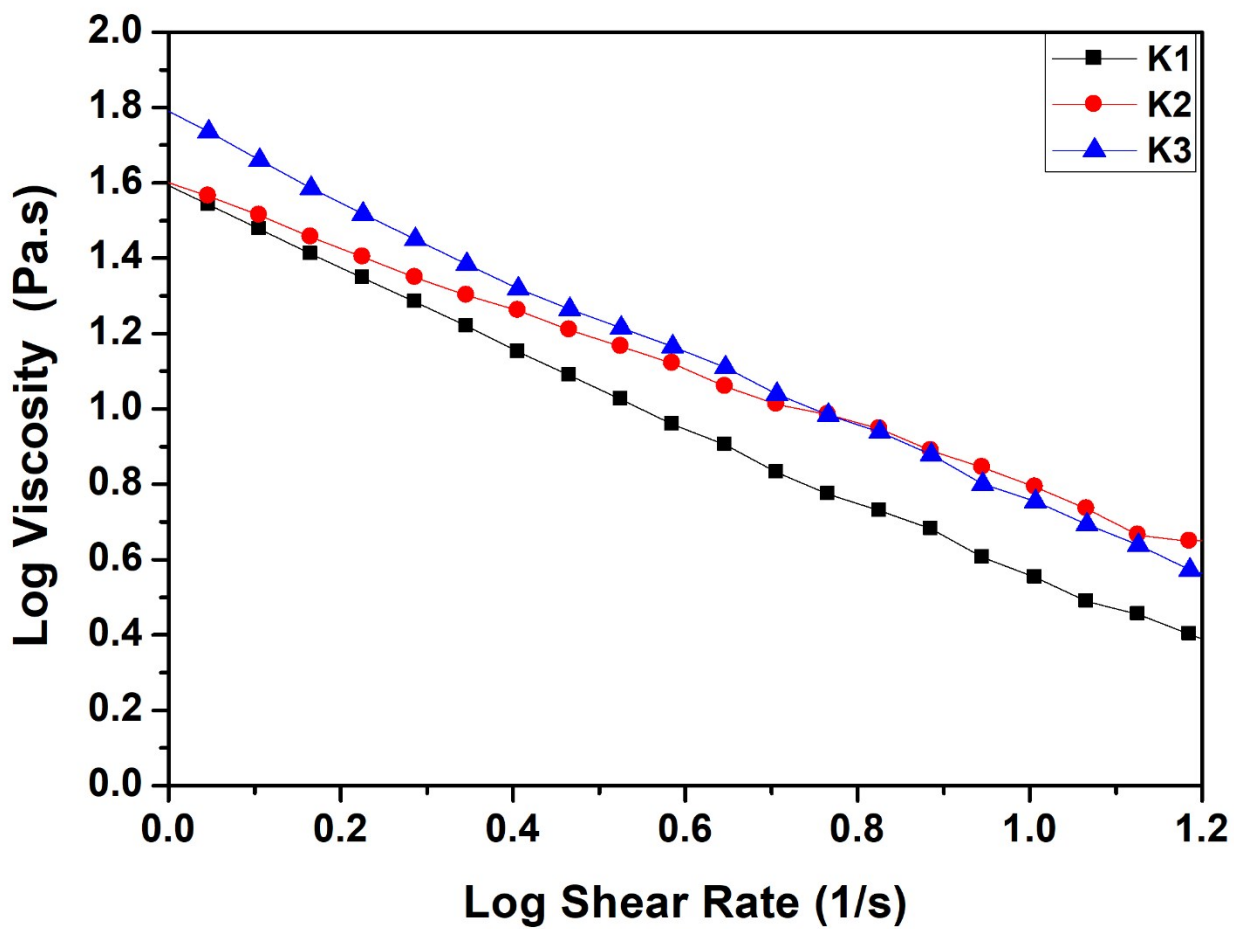

Fig. S4. Log viscosity versus log shear rate for K1, K2 and K3 beads.

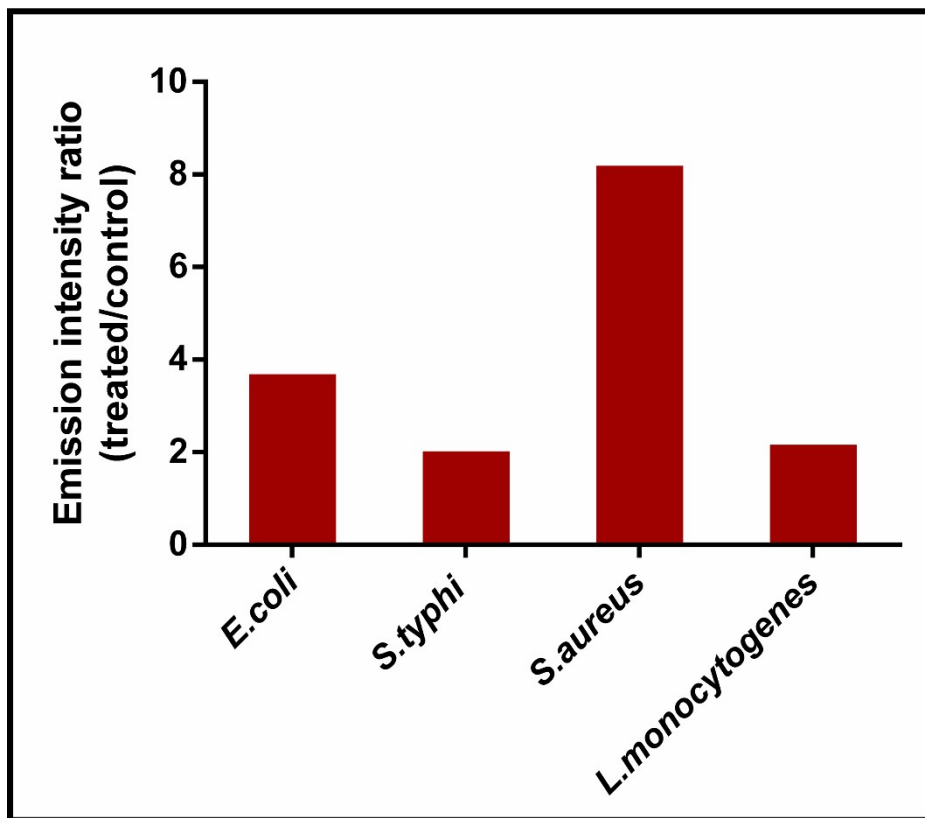

Fig. S5. Emission intensity ratio of PI after K3 treatment.
